# Supplementary material
Source: PubMed Central journal article supplement (PMC2768269)
Supplement: NIHMS127494-supplement-Figure_legends.pdf [file NIHMS127494-supplement-Figure_legends.pdf]

## **Supplementary Information Figure Legends**

### **SI Figure 1: Inhibition of miR-17 or miR-20a leads to 53BP1 foci accumulation**

Normal human fibroblasts were treated with siRNAs as in Fig 1b and were fixed 18h post release into complete media. Fixed cells were immunostained for 53BP1. Inset box shows magnified field.

### **SI Figure 2: Inhibition of miR-17 or miR-20 leads to a DDR that correlates with a G1 checkpoint**

Normal human fibroblasts were treated as in Fig 1A and were fixed 18h post release into complete media. Fixed cells were co-immunostained for  $\gamma$ H2AX and BrdU. The total percentage of cells positive for  $\gamma$ H2AX foci is shown, with the percentage of cells that costain (red) and do not costain with BrdU (green) indicated. The total percentage of cells in S phase is shown on the inset graph.
