# Supplementary material
Source: PubMed Central journal article supplement (PMC2768269)

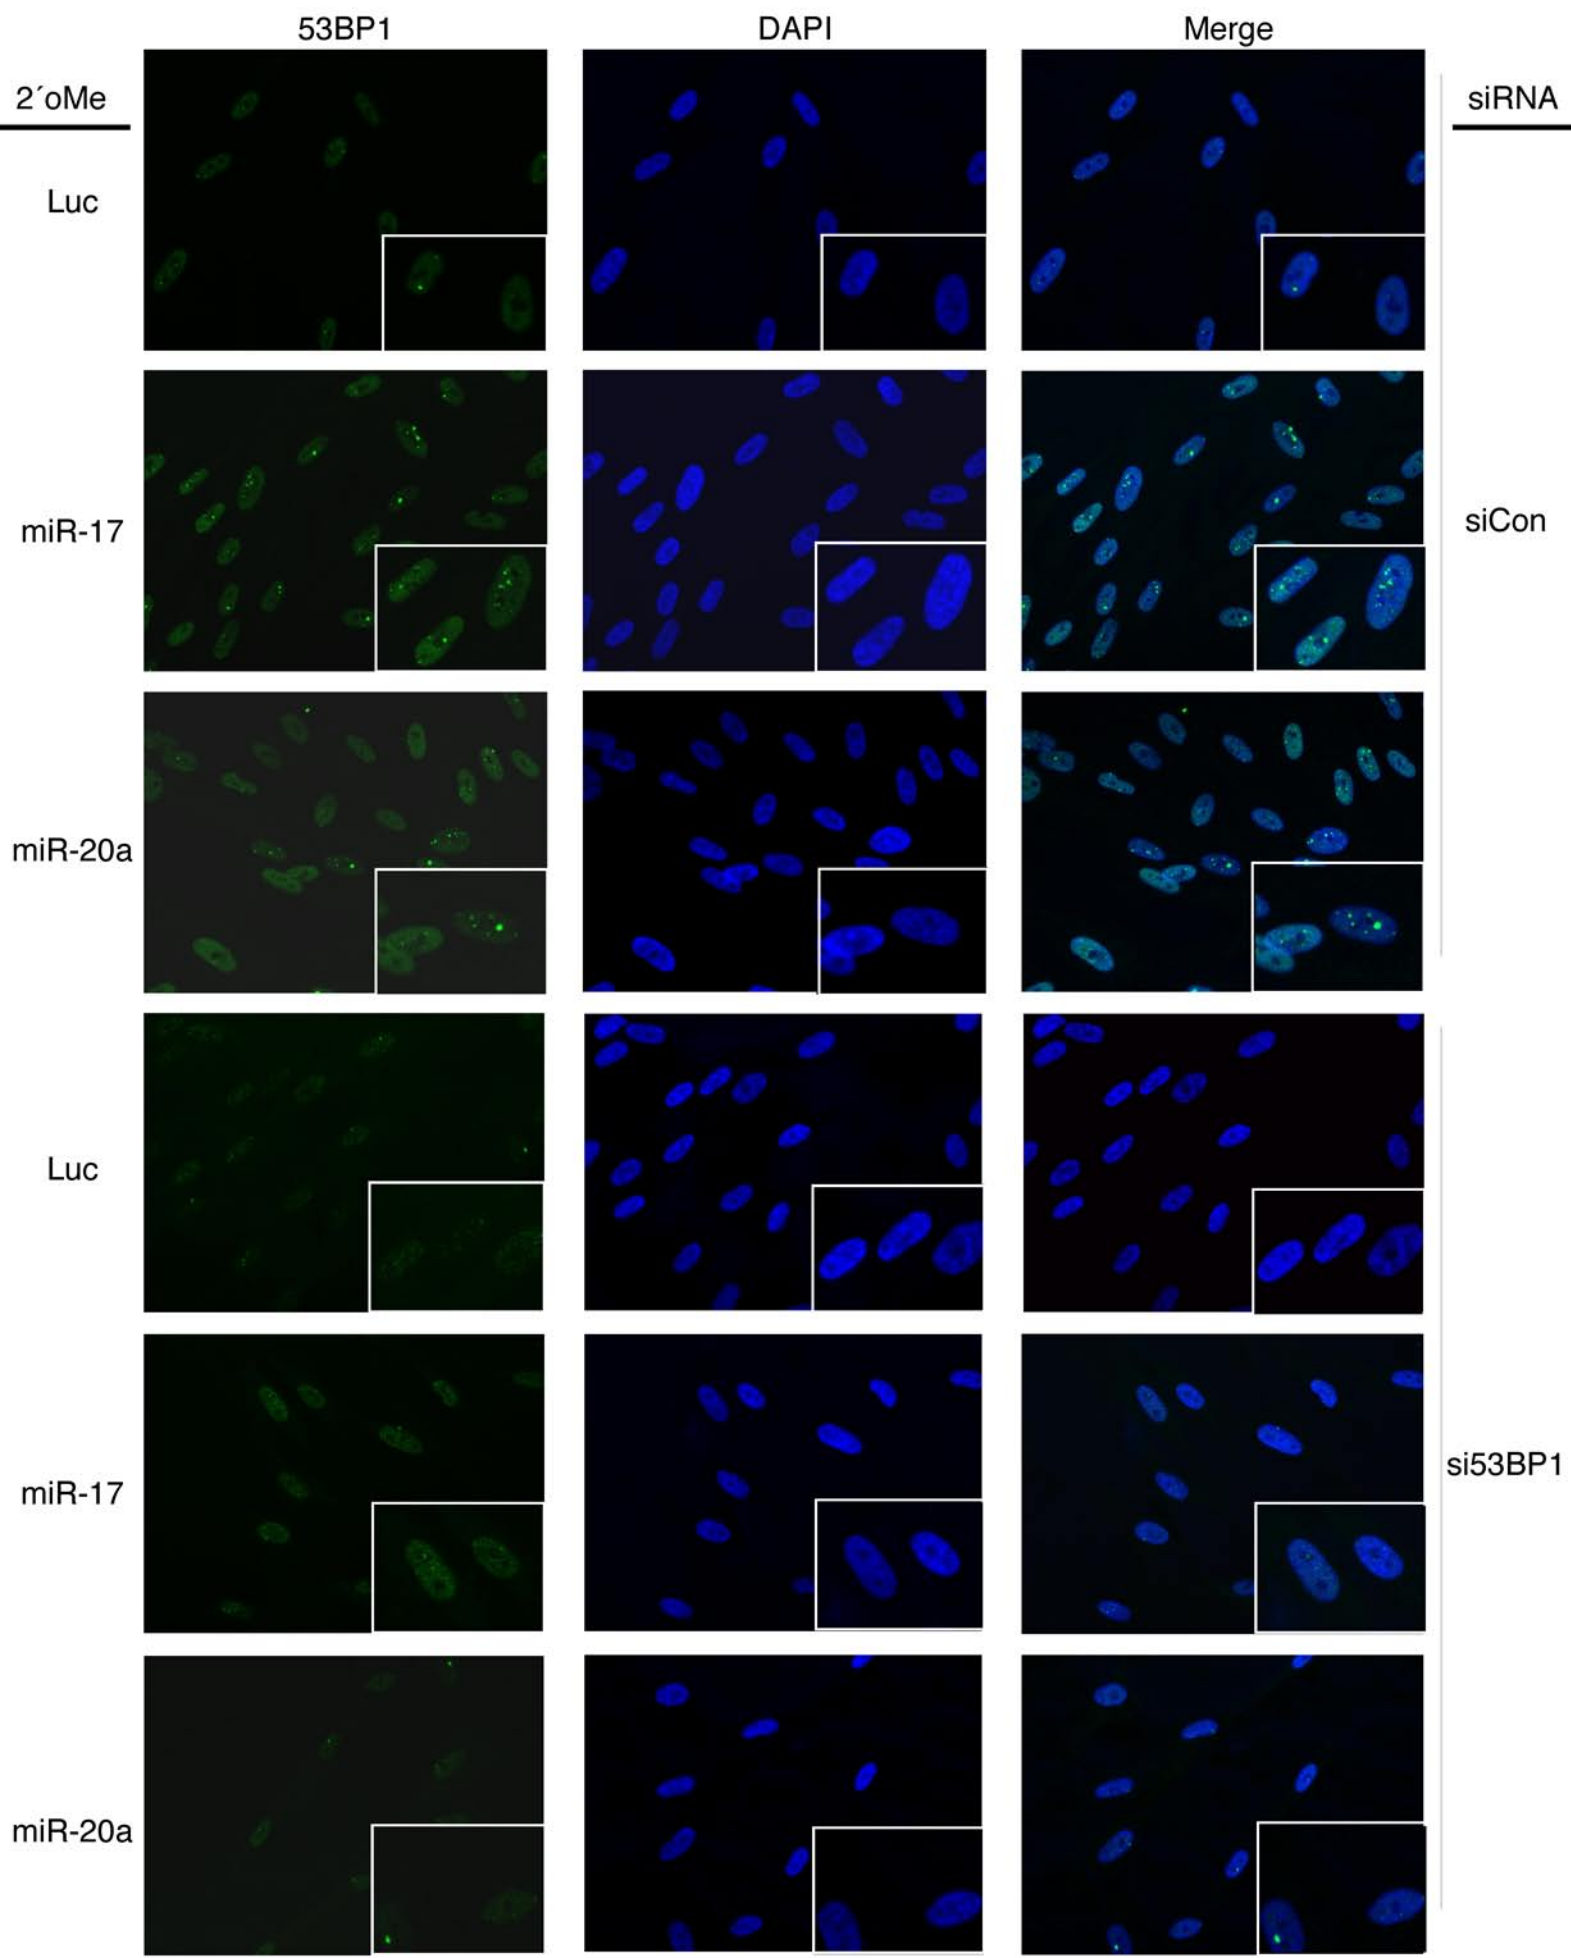

Supplement: NIHMS127494-supplement-Supplementary_Figure_1.pdf [file NIHMS127494-supplement-Supplementary_Figure_1.pdf]

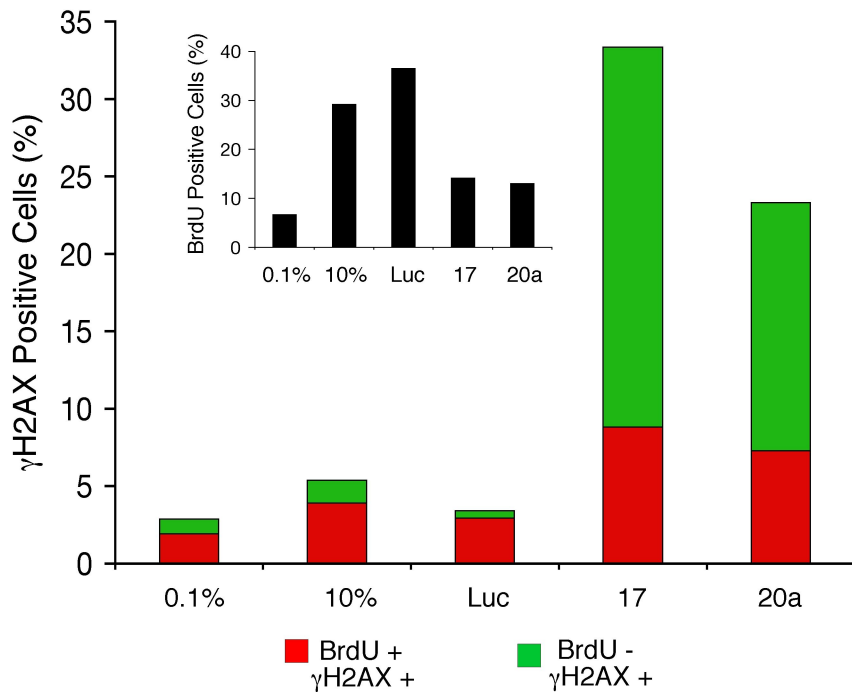

Supplement: NIHMS127494-supplement-Supplementary_Figure_2.pdf [file NIHMS127494-supplement-Supplementary_Figure_2.pdf]
